# Supplementary material for: Attenuated Salmonella potentiate PD-L1 blockade immunotherapy in a preclinical model of colorectal cancer
Source: PubMed Central journal article supplement (PMC9807881; doi:10.3389/fimmu.2022.1017780), 2022-12-20
Supplement: DataSheet_1.pdf [file DataSheet_1.pdf]

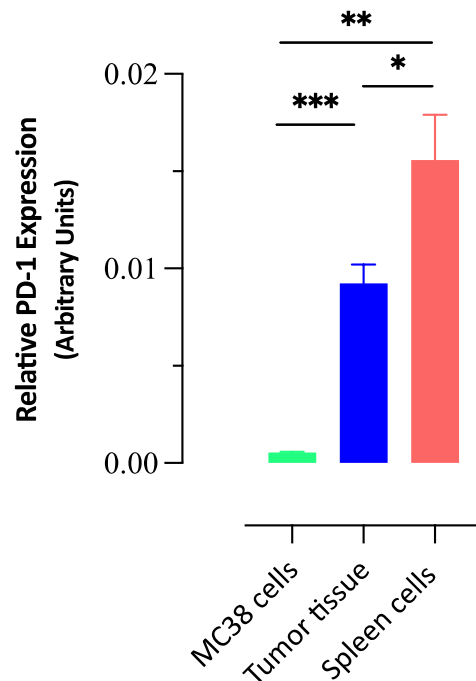

**Supplementary Figure 1:** Relative expression levels of PD-1 mRNA isolated from in vitro grown MC38 cells (n=3), whole MC38 tumor tissue (n=8), or normal spleen cells (n=6). Asterisks denote statistically significant differences between the indicated groups (\*\*\*p < 0.001; \*\*p < 0.01; \*p < 0.05). The results are pooled from three independent experiments.

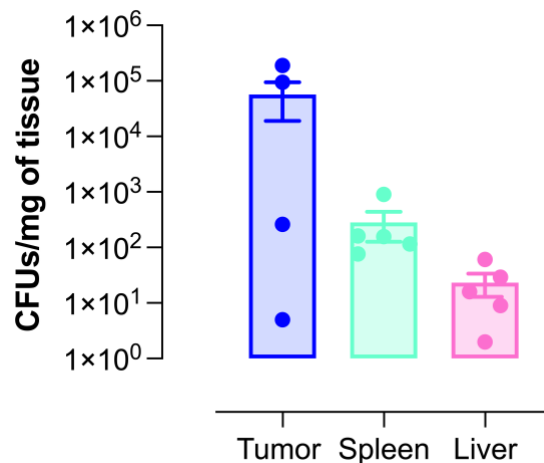

**Supplementary Figure 2: Bacterial colonization in different organs in MC38 tumor-bearing mice.** MC38 tumor cells ( $2 \times 10^5$ ) were subcutaneously implanted into the right flank of C57BL/6 mice. 14 days post implantation, mice were injected intraperitoneally with BRD509E ( $\sim 5 \times 10^3$  CFUs). Tumor-bearing mice were sacrificed on day 19 following treatment, organs were resected and bacterial loads (as described in the materials and methods) were determined in terms of CFUs/mg of tissue. The data shown is from one independent experiment.

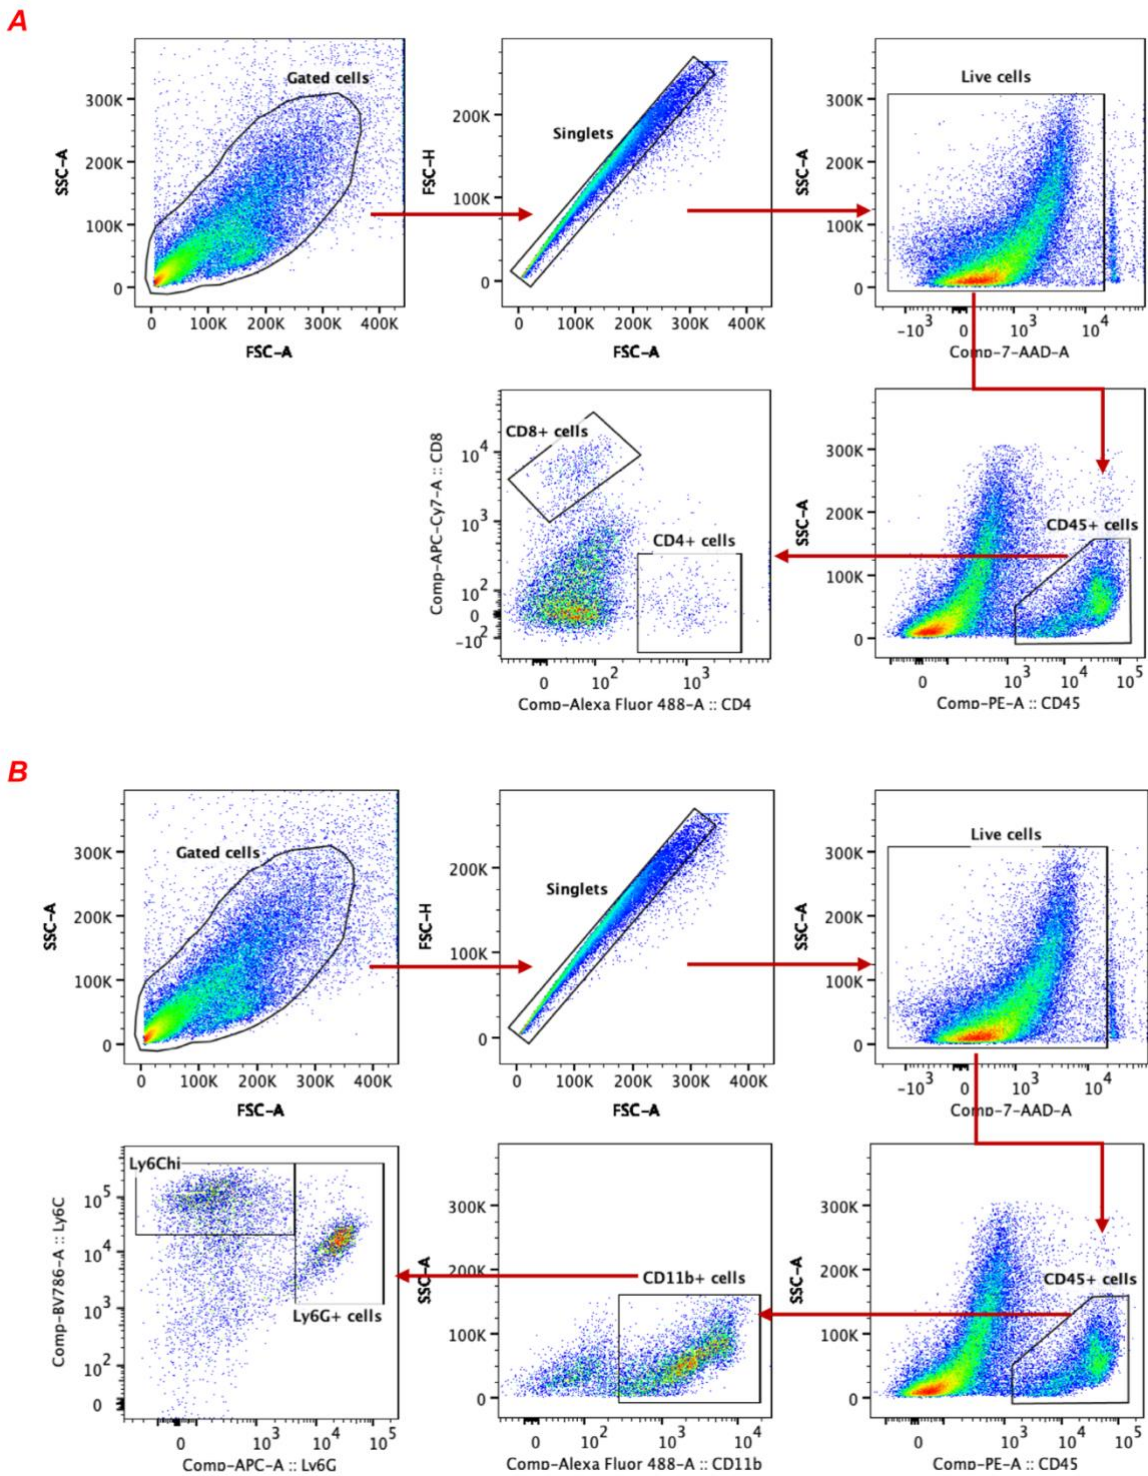

**Supplementary Figure 3: Gating strategies used to identify intratumoral lymphoid and myeloid subsets.** (A) Lymphoid subpopulations were identified using an antibody staining panel that include: CD45-PE, CD4-Alexa Flour 488, CD8-APC-Cy7 and 7AAD viability dye. (B) Myeloid subpopulations were identified using another antibody panel that include: CD45-PE, CD11b-Alexa Fluor 488, Ly6G-APC, Ly6C-BV785 and 7AAD viability dye.

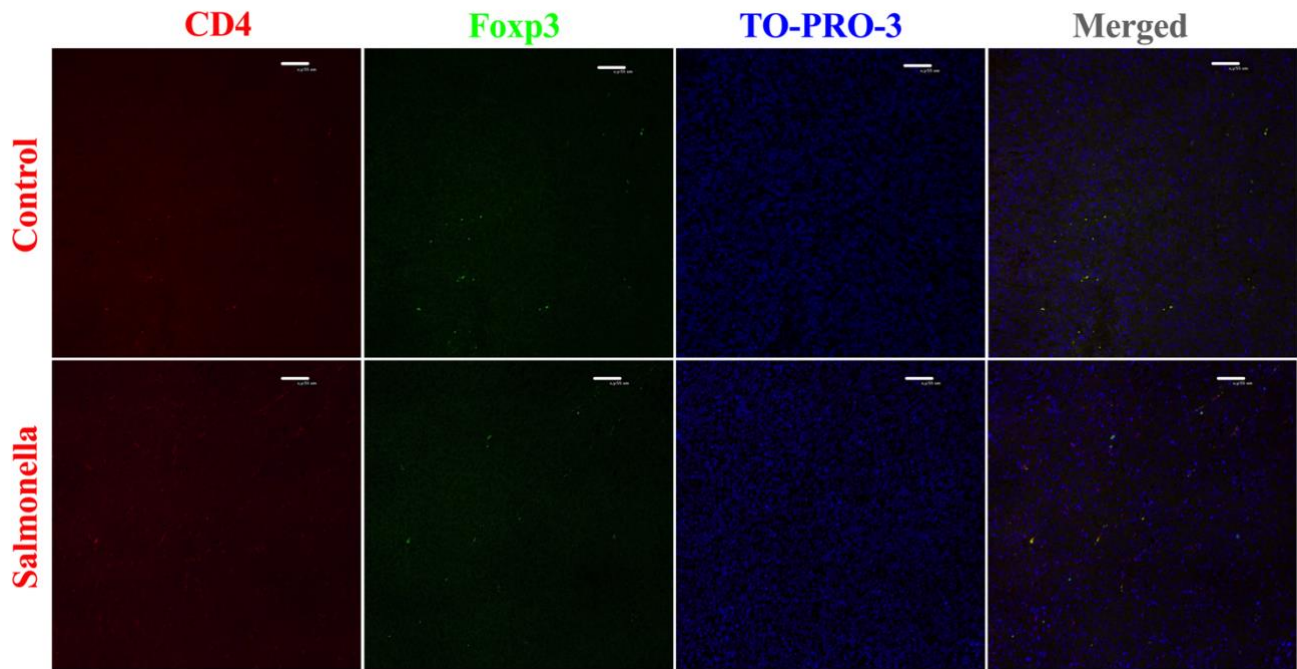

**Supplementary Figure 4: Treatment with a low dose of *Salmonella* decreased Tregs/CD4<sup>+</sup> cells ratio in MC38 tumor tissues.** Tumor sections were stained with anti CD4 and anti Foxp3 antibodies as described in the material and methods section. Representative immunofluorescent images- at lower magnification- of CD4, Foxp3, TO-PRO-3 nuclear staining and the merge picture from the control and *Salmonella*-treated groups are presented. Scale bar 55  $\mu$ m.

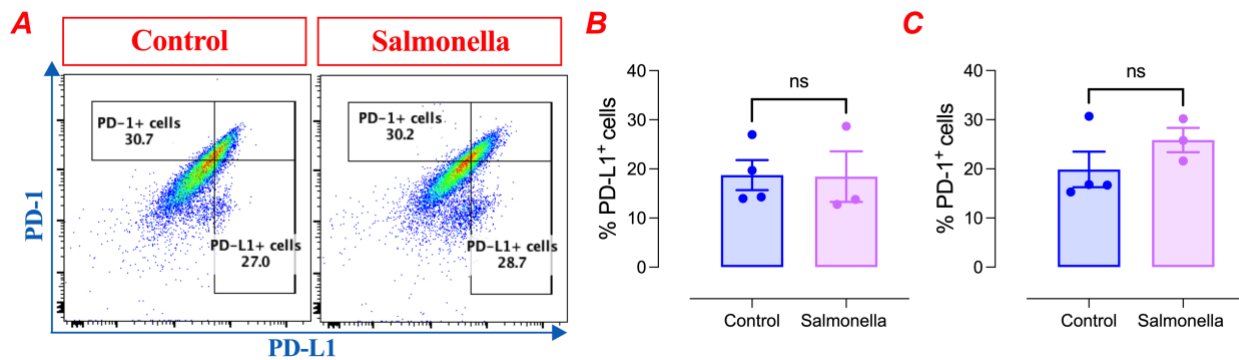

**Supplementary Figure 5: *Salmonella* treatment did not alter the expression of PD-L1 or PD-1 on CD45<sup>-</sup> cells in MC38 tumor tissues.** MC38 tumors were harvested from tumor-bearing mice on day 14 post bacterial treatment and CD45<sup>-</sup> cells were analyzed for their expression of PD-L1 or PD-1. Representative dot plots (A) and combined results analysis of the percentage of CD45<sup>-</sup> cells that express PD-L1 (B) or PD-1 (C) are illustrated for the control and *Salmonella*-treated groups. The data is presented using mean  $\pm$  SEM of 7-8 mice per group pooled from two independent experiments.

**A**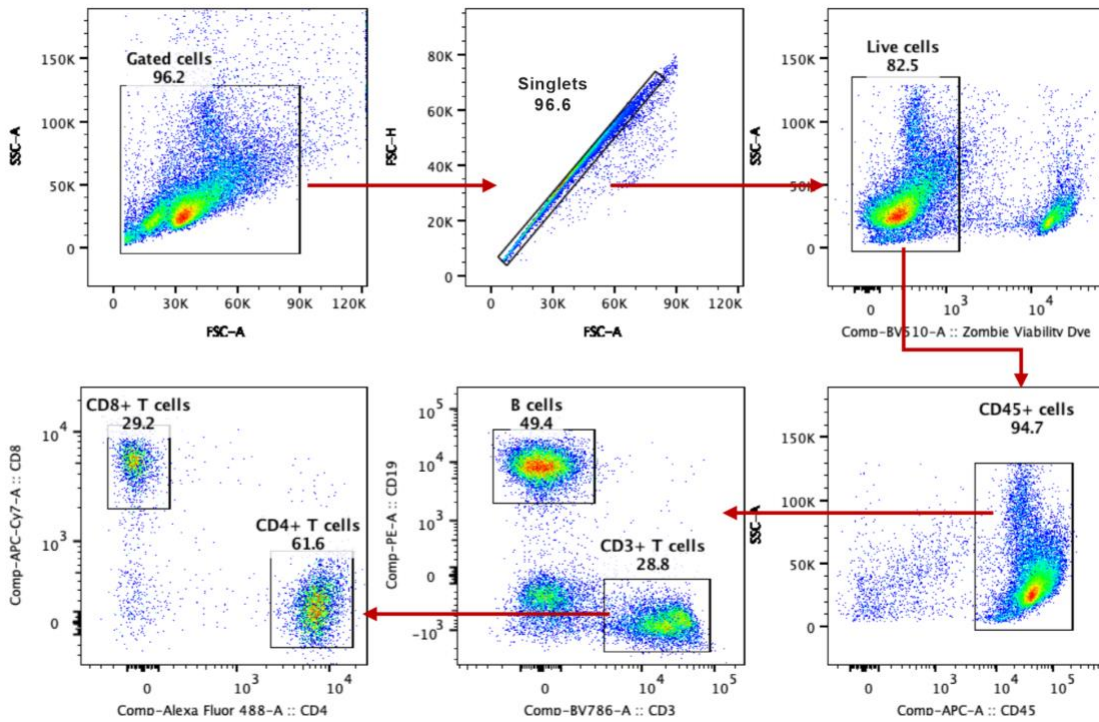**B**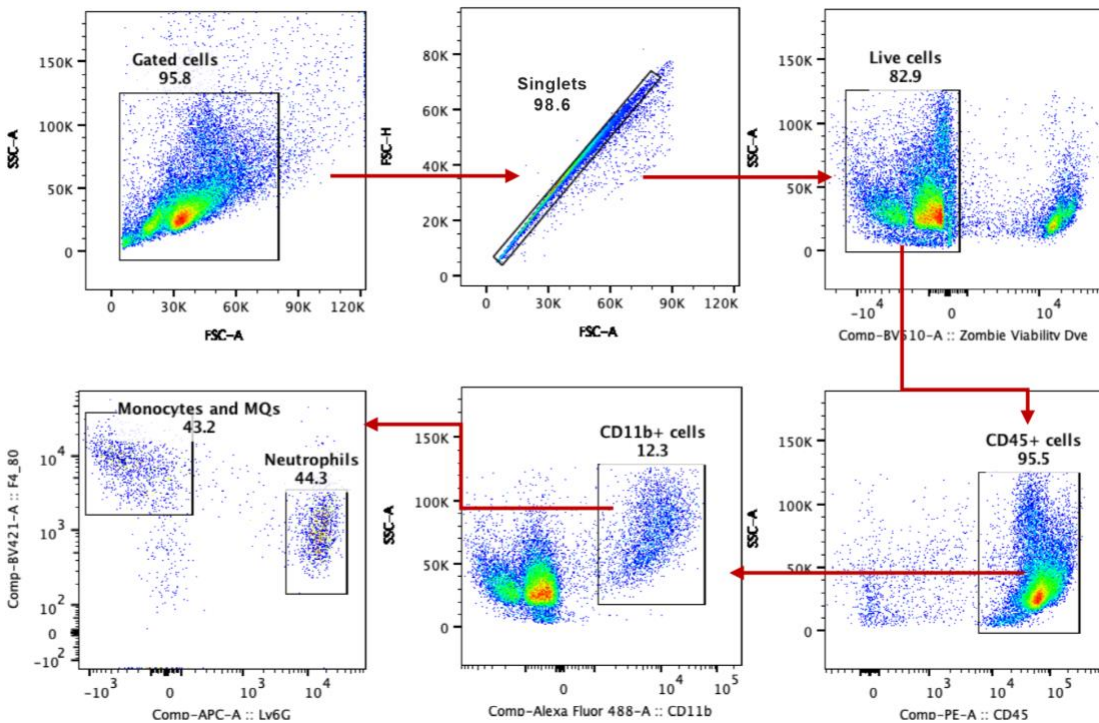

**Supplementary Figure 6: Gating strategies used to identify the splenic lymphoid and myeloid subsets.** (A) Lymphoid subpopulations were identified using an antibody staining panel that include: CD45-APC, CD3-BV 785, CD19-PE, CD4-FITC, CD8-APC-Cy7, and Zombie Aqua viability dye. (B) Myeloid subpopulations were identified using another antibody panel that include: CD45-PE, CD11b-Alexa Fluor 488, Ly6G-APC, F4/80-BV 421 and Zombie Aqua viability dye.

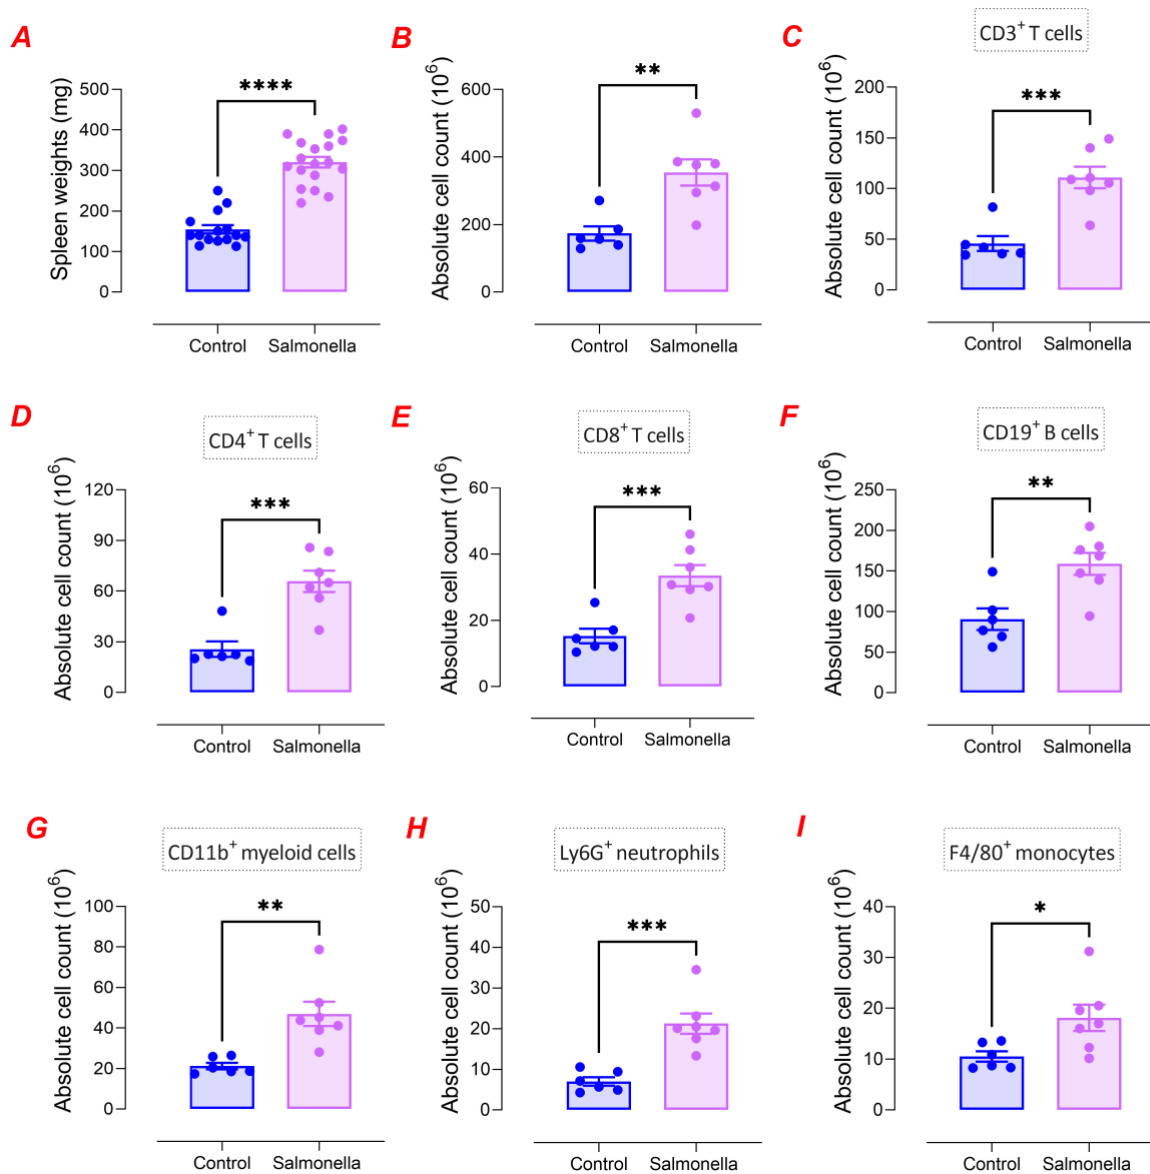

**Supplementary Figure 7: *Salmonella* increases the number of lymphoid and myeloid immune cells in the spleens of MC38 tumor-bearing mice.** The effect of *Salmonella* treatment on spleen weights is illustrated (A). The absolute cell counts of total spleen (B), T cells (C), CD4<sup>+</sup> T cells (D), CD8<sup>+</sup> T cells (E), B cells (F), CD11b<sup>+</sup> myeloid cells (G), neutrophils (Ly6G<sup>+</sup>) (H) and monocytes/macrophages (Ly6G<sup>-</sup> F4/80<sup>+</sup>) (I) were determined and presented. Each data point represents a single mouse pooled from two independent experiment. Asterisks denote statistically significant differences from control group, \* (P < 0.05), \*\* (P < 0.01), \*\*\* (P < 0.001) and ns (no statistical significance, > 0.05).

**Table I**

| <b>Experimental Group</b> | <b>Rate Constant (k)<br/>(95% CI)</b> | <b>Doubling Time (days)<br/>(95% CI)</b> |
|---------------------------|---------------------------------------|------------------------------------------|
| Control (Saline)          | 0.1835<br>(0.1279 to 0.2621)          | 3.777<br>(2.645 to 5.418)                |
| Control (Isotype Ab)      | 0.1823<br>(0.1393 to 0.2378)          | 3.803<br>(2.915 to 4.975)                |
| Salmonella Only           | 0.1679<br>(0.1257 to 0.2226)          | 4.129<br>(3.113 to 5.515)                |
| Salmonella + IgG          | 0.1634<br>(0.0556 to 0.4063)          | 4.242<br>(1.706 to 12.46)                |
| Anti-PD-L1 Ab Only        | 0.1752<br>(0.0931 to 0.3194)          | 3.957<br>(2.170 to 7.444)                |
| Salmonella+anti-PD-L1 Ab  | 0.1091<br>(0.0766 to 0.1475)          | 6.356<br>(4.699 to 0.045)                |
